# Supplementary material for: Comparison of Glycomacropeptide with Phenylalanine Free-Synthetic Amino Acids in Test Meals to PKU Patients: No Significant Differences in Biomarkers, Including Plasma Phe Levels
Source: Hindawi journal article supplement (doi:10.1155/2018/6352919), 2018-01-01
Supplement: f1 [file 6352919.f1.pdf]

## Supplementary

**Table A: Results for all AA at time 0, 15, 30, 60, 120 and 240 (Mean and SD)**

| Time (min) | DM1  |     | DM2  |     | DM3  |     | DM4  |     |
|------------|------|-----|------|-----|------|-----|------|-----|
|            | Mean | SD  | Mean | SD  | Mean | SD  | Mean | SD  |
| Glycine    |      |     |      |     |      |     |      |     |
| 0          | 393  | 119 | 369  | 115 | 367  | 147 | 312  | 87  |
| 15         | 378  | 142 | 456  | 180 | 297  | 93  | 368  | 198 |
| 30         | 417  | 136 | 441  | 222 | 336  | 103 | 407  | 183 |
| 60         | 371  | 171 | 398  | 169 | 302  | 94  | 287  | 129 |
| 120        | 397  | 139 | 452  | 186 | 284  | 76  | 383  | 145 |
| 240        | 378  | 135 | 361  | 199 | 296  | 79  | 369  | 161 |
| Alanine    |      |     |      |     |      |     |      |     |
| 0          | 273  | 55  | 328  | 83  | 306  | 104 | 299  | 95  |
| 15         | 452  | 169 | 526  | 118 | 369  | 137 | 462  | 117 |
| 30         | 638  | 314 | 546  | 173 | 439  | 220 | 464  | 157 |
| 60         | 529  | 172 | 532  | 107 | 358  | 138 | 438  | 160 |

|     |     |     |     |    |     |    |     |     |
|-----|-----|-----|-----|----|-----|----|-----|-----|
| 120 | 412 | 189 | 431 | 94 | 332 | 62 | 390 | 130 |
|-----|-----|-----|-----|----|-----|----|-----|-----|

|     |     |    |     |    |     |    |     |     |
|-----|-----|----|-----|----|-----|----|-----|-----|
| 240 | 337 | 86 | 382 | 72 | 302 | 68 | 300 | 119 |
|-----|-----|----|-----|----|-----|----|-----|-----|

| Serine | Mean | SD | Mean | SD | Mean | SD | Mean | SD |
|--------|------|----|------|----|------|----|------|----|
|--------|------|----|------|----|------|----|------|----|

|   |     |    |     |    |     |    |     |    |
|---|-----|----|-----|----|-----|----|-----|----|
| 0 | 107 | 22 | 104 | 25 | 103 | 24 | 100 | 26 |
|---|-----|----|-----|----|-----|----|-----|----|

|    |     |    |     |    |     |    |     |    |
|----|-----|----|-----|----|-----|----|-----|----|
| 15 | 179 | 51 | 172 | 25 | 125 | 28 | 153 | 51 |
|----|-----|----|-----|----|-----|----|-----|----|

|    |     |     |     |    |     |    |     |    |
|----|-----|-----|-----|----|-----|----|-----|----|
| 30 | 235 | 110 | 177 | 67 | 129 | 38 | 142 | 44 |
|----|-----|-----|-----|----|-----|----|-----|----|

|    |     |    |     |    |    |    |     |    |
|----|-----|----|-----|----|----|----|-----|----|
| 60 | 165 | 45 | 152 | 39 | 97 | 12 | 120 | 40 |
|----|-----|----|-----|----|----|----|-----|----|

|     |     |    |     |    |    |    |    |    |
|-----|-----|----|-----|----|----|----|----|----|
| 120 | 110 | 22 | 115 | 34 | 89 | 16 | 98 | 24 |
|-----|-----|----|-----|----|----|----|----|----|

|     |     |    |     |    |    |    |    |    |
|-----|-----|----|-----|----|----|----|----|----|
| 240 | 128 | 46 | 113 | 22 | 93 | 11 | 96 | 32 |
|-----|-----|----|-----|----|----|----|----|----|

| Proline | Mean | SD | Mean | SD | Mean | SD | Mean | SD |
|---------|------|----|------|----|------|----|------|----|
|---------|------|----|------|----|------|----|------|----|

|   |     |    |     |    |     |    |     |    |
|---|-----|----|-----|----|-----|----|-----|----|
| 0 | 102 | 21 | 106 | 28 | 111 | 29 | 105 | 31 |
|---|-----|----|-----|----|-----|----|-----|----|

|    |     |     |     |    |     |    |     |    |
|----|-----|-----|-----|----|-----|----|-----|----|
| 15 | 296 | 109 | 338 | 68 | 197 | 49 | 262 | 40 |
|----|-----|-----|-----|----|-----|----|-----|----|

|    |     |     |     |    |     |    |     |    |
|----|-----|-----|-----|----|-----|----|-----|----|
| 30 | 396 | 110 | 324 | 91 | 204 | 75 | 247 | 58 |
|----|-----|-----|-----|----|-----|----|-----|----|

|    |     |    |     |     |     |    |     |    |
|----|-----|----|-----|-----|-----|----|-----|----|
| 60 | 287 | 93 | 302 | 121 | 163 | 28 | 210 | 42 |
|----|-----|----|-----|-----|-----|----|-----|----|

|     |     |    |     |     |     |    |     |    |
|-----|-----|----|-----|-----|-----|----|-----|----|
| 120 | 182 | 37 | 243 | 125 | 142 | 34 | 158 | 32 |
|-----|-----|----|-----|-----|-----|----|-----|----|

|     |     |    |     |    |     |    |     |    |
|-----|-----|----|-----|----|-----|----|-----|----|
| 240 | 155 | 48 | 172 | 38 | 125 | 26 | 119 | 48 |
|-----|-----|----|-----|----|-----|----|-----|----|

| Valine | Mean | SD | Mean | SD | Mean | SD | Mean | SD |
|--------|------|----|------|----|------|----|------|----|
|--------|------|----|------|----|------|----|------|----|

|   |     |    |     |     |     |    |     |    |
|---|-----|----|-----|-----|-----|----|-----|----|
| 0 | 229 | 46 | 250 | 100 | 217 | 46 | 209 | 48 |
|---|-----|----|-----|-----|-----|----|-----|----|

|    |     |     |     |    |     |    |     |    |
|----|-----|-----|-----|----|-----|----|-----|----|
| 15 | 452 | 132 | 412 | 85 | 317 | 81 | 389 | 57 |
|----|-----|-----|-----|----|-----|----|-----|----|

|    |     |     |     |     |     |     |     |    |
|----|-----|-----|-----|-----|-----|-----|-----|----|
| 30 | 574 | 172 | 464 | 161 | 373 | 124 | 390 | 94 |
|----|-----|-----|-----|-----|-----|-----|-----|----|

|    |     |     |     |    |     |    |     |    |
|----|-----|-----|-----|----|-----|----|-----|----|
| 60 | 516 | 111 | 430 | 82 | 267 | 44 | 319 | 79 |
|----|-----|-----|-----|----|-----|----|-----|----|

|     |     |    |     |    |     |     |     |     |
|-----|-----|----|-----|----|-----|-----|-----|-----|
| 120 | 391 | 95 | 386 | 84 | 285 | 111 | 316 | 163 |
|-----|-----|----|-----|----|-----|-----|-----|-----|

|     |     |    |     |    |     |    |     |     |
|-----|-----|----|-----|----|-----|----|-----|-----|
| 240 | 362 | 90 | 355 | 42 | 234 | 35 | 264 | 105 |
|-----|-----|----|-----|----|-----|----|-----|-----|

| Threonine | Mean | SD | Mean | SD | Mean | SD | Mean | SD |
|-----------|------|----|------|----|------|----|------|----|
|-----------|------|----|------|----|------|----|------|----|

|   |     |    |     |    |     |    |     |    |
|---|-----|----|-----|----|-----|----|-----|----|
| 0 | 123 | 65 | 111 | 33 | 117 | 47 | 117 | 57 |
|---|-----|----|-----|----|-----|----|-----|----|

|     |     |     |     |     |     |     |     |     |
|-----|-----|-----|-----|-----|-----|-----|-----|-----|
| 15  | 320 | 183 | 283 | 79  | 190 | 58  | 242 | 35  |
| 30  | 479 | 333 | 352 | 194 | 216 | 113 | 279 | 109 |
| 60  | 352 | 154 | 311 | 83  | 191 | 70  | 242 | 109 |
| 120 | 248 | 128 | 249 | 50  | 168 | 37  | 193 | 77  |
| 240 | 226 | 108 | 217 | 47  | 155 | 42  | 161 | 86  |

| Leucine | Mean | SD | Mean | SD | Mean | SD | Mean | SD |
|---------|------|----|------|----|------|----|------|----|
|---------|------|----|------|----|------|----|------|----|

---

|     |     |    |     |    |     |    |     |    |
|-----|-----|----|-----|----|-----|----|-----|----|
| 0   | 93  | 16 | 87  | 23 | 86  | 21 | 93  | 22 |
| 15  | 128 | 27 | 121 | 25 | 196 | 57 | 208 | 53 |
| 30  | 133 | 26 | 107 | 33 | 200 | 75 | 184 | 51 |
| 60  | 93  | 22 | 86  | 25 | 143 | 29 | 147 | 40 |
| 120 | 54  | 18 | 55  | 16 | 94  | 28 | 93  | 22 |
| 240 | 77  | 18 | 71  | 16 | 76  | 17 | 77  | 28 |

| Isoleucine | Mean | SD | Mean | SD | Mean | SD | Mean | SD |
|------------|------|----|------|----|------|----|------|----|
|------------|------|----|------|----|------|----|------|----|

---

|     |     |    |     |    |     |    |     |    |
|-----|-----|----|-----|----|-----|----|-----|----|
| 0   | 37  | 8  | 38  | 15 | 38  | 11 | 40  | 14 |
| 15  | 218 | 86 | 186 | 32 | 134 | 43 | 146 | 47 |
| 30  | 263 | 61 | 176 | 61 | 140 | 58 | 122 | 38 |
| 60  | 195 | 48 | 159 | 28 | 95  | 30 | 106 | 25 |
| 120 | 128 | 27 | 118 | 28 | 66  | 22 | 59  | 17 |
| 240 | 97  | 26 | 98  | 24 | 52  | 9  | 45  | 19 |

| Lysine | Mean | SD | Mean | SD | Mean | SD | Mean | SD |
|--------|------|----|------|----|------|----|------|----|
|--------|------|----|------|----|------|----|------|----|

---

|     |     |     |     |    |     |    |     |    |
|-----|-----|-----|-----|----|-----|----|-----|----|
| 0   | 118 | 38  | 131 | 33 | 135 | 13 | 112 | 30 |
| 15  | 258 | 144 | 224 | 62 | 220 | 68 | 188 | 52 |
| 30  | 265 | 108 | 186 | 31 | 224 | 90 | 156 | 37 |
| 60  | 215 | 64  | 168 | 57 | 187 | 61 | 161 | 55 |
| 120 | 173 | 67  | 137 | 27 | 127 | 21 | 133 | 18 |
| 240 | 148 | 45  | 134 | 38 | 118 | 32 | 132 | 48 |

| Asparagine    | Mean | SD  | Mean | SD  | Mean | SD  | Mean | SD  |
|---------------|------|-----|------|-----|------|-----|------|-----|
| 0             | 47   | 8   | 45   | 10  | 47   | 9   | 45   | 10  |
| 15            | 77   | 21  | 68   | 13  | 76   | 15  | 72   | 16  |
| 30            | 93   | 29  | 59   | 18  | 72   | 27  | 68   | 16  |
| 60            | 66   | 15  | 51   | 10  | 63   | 11  | 58   | 17  |
| 120           | 47   | 9   | 43   | 8   | 48   | 8   | 46   | 10  |
| 240           | 57   | 17  | 47   | 7   | 46   | 5   | 38   | 10  |
| Tyrosine      | Mean | SD  | Mean | SD  | Mean | SD  | Mean | SD  |
| 0             | 46   | 9   | 50   | 10  | 47   | 5   | 47   | 12  |
| 15            | 37   | 6   | 48   | 9   | 77   | 11  | 73   | 9   |
| 30            | 40   | 7   | 41   | 12  | 93   | 25  | 72   | 22  |
| 60            | 35   | 9   | 35   | 8   | 81   | 13  | 75   | 26  |
| 120           | 27   | 10  | 29   | 8   | 78   | 19  | 78   | 17  |
| 240           | 30   | 7   | 30   | 5   | 61   | 15  | 63   | 19  |
| Phenylalanine | Mean | SD  | Mean | SD  | Mean | SD  | Mean | SD  |
| 0             | 809  | 431 | 827  | 268 | 901  | 410 | 747  | 334 |
| 15            | 762  | 368 | 872  | 343 | 801  | 375 | 787  | 334 |
| 30            | 819  | 393 | 786  | 248 | 821  | 377 | 733  | 350 |
| 60            | 801  | 441 | 790  | 280 | 760  | 363 | 707  | 334 |
| 120           | 757  | 386 | 797  | 316 | 792  | 406 | 703  | 332 |
| 240           | 790  | 368 | 856  | 289 | 819  | 393 | 688  | 326 |
| glutamic acid | Mean | SD  | Mean | SD  | Mean | SD  | Mean | SD  |
| 0             | 45   | 6   | 45   | 14  | 50   | 16  | 44   | 18  |
| 15            | 59   | 13  | 50   | 12  | 47   | 12  | 49   | 19  |
| 30            | 56   | 7   | 48   | 11  | 47   | 11  | 45   | 16  |
| 60            | 48   | 14  | 45   | 11  | 40   | 7   | 42   | 15  |

|     |    |    |    |    |    |   |    |    |
|-----|----|----|----|----|----|---|----|----|
| 120 | 41 | 10 | 40 | 13 | 38 | 7 | 36 | 10 |
|-----|----|----|----|----|----|---|----|----|

|     |    |   |    |    |    |   |    |    |
|-----|----|---|----|----|----|---|----|----|
| 240 | 43 | 9 | 43 | 10 | 38 | 9 | 39 | 15 |
|-----|----|---|----|----|----|---|----|----|

| glutamine | Mean | SD | Mean | SD | Mean | SD | Mean | SD |
|-----------|------|----|------|----|------|----|------|----|
|-----------|------|----|------|----|------|----|------|----|

|   |     |     |     |     |     |    |     |    |
|---|-----|-----|-----|-----|-----|----|-----|----|
| 0 | 563 | 107 | 527 | 143 | 678 | 85 | 594 | 98 |
|---|-----|-----|-----|-----|-----|----|-----|----|

|    |     |     |     |    |     |    |     |    |
|----|-----|-----|-----|----|-----|----|-----|----|
| 15 | 719 | 199 | 810 | 72 | 793 | 92 | 735 | 90 |
|----|-----|-----|-----|----|-----|----|-----|----|

|    |     |     |     |     |     |     |     |     |
|----|-----|-----|-----|-----|-----|-----|-----|-----|
| 30 | 737 | 131 | 795 | 158 | 719 | 130 | 684 | 154 |
|----|-----|-----|-----|-----|-----|-----|-----|-----|

|    |     |    |     |     |     |     |     |     |
|----|-----|----|-----|-----|-----|-----|-----|-----|
| 60 | 727 | 87 | 779 | 121 | 702 | 147 | 666 | 163 |
|----|-----|----|-----|-----|-----|-----|-----|-----|

|     |     |     |     |     |     |     |     |     |
|-----|-----|-----|-----|-----|-----|-----|-----|-----|
| 120 | 701 | 124 | 632 | 106 | 618 | 103 | 658 | 144 |
|-----|-----|-----|-----|-----|-----|-----|-----|-----|

|     |     |     |     |     |     |    |     |     |
|-----|-----|-----|-----|-----|-----|----|-----|-----|
| 240 | 699 | 131 | 670 | 221 | 624 | 34 | 541 | 152 |
|-----|-----|-----|-----|-----|-----|----|-----|-----|

| Aspartic acid | Mean | SD | Mean | SD | Mean | SD | Mean | SD |
|---------------|------|----|------|----|------|----|------|----|
|---------------|------|----|------|----|------|----|------|----|

|   |    |   |    |   |    |   |    |   |
|---|----|---|----|---|----|---|----|---|
| 0 | 18 | 6 | 16 | 5 | 18 | 9 | 15 | 6 |
|---|----|---|----|---|----|---|----|---|

|    |    |    |    |   |    |   |    |   |
|----|----|----|----|---|----|---|----|---|
| 15 | 32 | 10 | 19 | 5 | 18 | 3 | 17 | 4 |
|----|----|----|----|---|----|---|----|---|

|    |    |    |    |   |    |    |    |   |
|----|----|----|----|---|----|----|----|---|
| 30 | 39 | 19 | 18 | 6 | 21 | 10 | 15 | 5 |
|----|----|----|----|---|----|----|----|---|

|    |    |   |    |   |    |   |    |   |
|----|----|---|----|---|----|---|----|---|
| 60 | 28 | 9 | 14 | 5 | 18 | 7 | 13 | 5 |
|----|----|---|----|---|----|---|----|---|

|     |    |   |    |   |    |   |    |   |
|-----|----|---|----|---|----|---|----|---|
| 120 | 19 | 8 | 13 | 3 | 14 | 3 | 13 | 4 |
|-----|----|---|----|---|----|---|----|---|

|     |    |   |    |   |    |   |    |   |
|-----|----|---|----|---|----|---|----|---|
| 240 | 20 | 7 | 16 | 5 | 13 | 5 | 13 | 6 |
|-----|----|---|----|---|----|---|----|---|

| Tryptophan | Mean | SD | Mean | SD | Mean | SD | Mean | SD |
|------------|------|----|------|----|------|----|------|----|
|------------|------|----|------|----|------|----|------|----|

|   |    |   |    |    |    |    |    |   |
|---|----|---|----|----|----|----|----|---|
| 0 | 36 | 9 | 33 | 10 | 33 | 11 | 32 | 7 |
|---|----|---|----|----|----|----|----|---|

|    |    |   |    |    |    |   |    |   |
|----|----|---|----|----|----|---|----|---|
| 15 | 35 | 9 | 36 | 10 | 40 | 9 | 48 | 6 |
|----|----|---|----|----|----|---|----|---|

|    |    |    |    |    |    |    |    |    |
|----|----|----|----|----|----|----|----|----|
| 30 | 40 | 14 | 33 | 12 | 47 | 18 | 44 | 14 |
|----|----|----|----|----|----|----|----|----|

|    |    |   |    |   |    |   |    |    |
|----|----|---|----|---|----|---|----|----|
| 60 | 32 | 7 | 29 | 9 | 38 | 9 | 40 | 14 |
|----|----|---|----|---|----|---|----|----|

|     |    |   |    |   |    |   |    |   |
|-----|----|---|----|---|----|---|----|---|
| 120 | 26 | 9 | 25 | 5 | 35 | 5 | 33 | 8 |
|-----|----|---|----|---|----|---|----|---|

|     |    |    |    |   |    |   |    |    |
|-----|----|----|----|---|----|---|----|----|
| 240 | 29 | 11 | 29 | 9 | 31 | 4 | 32 | 12 |
|-----|----|----|----|---|----|---|----|----|

| Ornithine | Mean | SD | Mean | SD | Mean | SD | Mean | SD |
|-----------|------|----|------|----|------|----|------|----|
|-----------|------|----|------|----|------|----|------|----|

|   |    |   |    |    |    |   |    |   |
|---|----|---|----|----|----|---|----|---|
| 0 | 41 | 8 | 36 | 10 | 34 | 6 | 33 | 7 |
|---|----|---|----|----|----|---|----|---|

|     |    |    |    |    |    |    |    |    |
|-----|----|----|----|----|----|----|----|----|
| 15  | 53 | 12 | 44 | 10 | 43 | 9  | 48 | 11 |
| 30  | 63 | 22 | 39 | 9  | 47 | 11 | 45 | 10 |
| 60  | 53 | 13 | 38 | 8  | 39 | 7  | 44 | 13 |
| 120 | 41 | 8  | 39 | 12 | 36 | 8  | 36 | 7  |
| 240 | 41 | 6  | 39 | 8  | 33 | 5  | 32 | 10 |

| Arginine | Mean | SD | Mean | SD | Mean | SD | Mean | SD |
|----------|------|----|------|----|------|----|------|----|
| 0        | 41   | 8  | 36   | 10 | 34   | 6  | 33   | 7  |
| 15       | 53   | 12 | 44   | 10 | 43   | 9  | 48   | 11 |
| 30       | 63   | 22 | 39   | 9  | 47   | 11 | 45   | 10 |
| 60       | 53   | 13 | 38   | 8  | 39   | 7  | 44   | 13 |
| 120      | 41   | 8  | 39   | 12 | 36   | 8  | 36   | 7  |
| 240      | 41   | 6  | 39   | 8  | 33   | 5  | 32   | 10 |

| Citrulline | Mean | SD | Mean | SD | Mean | SD | Mean | SD |
|------------|------|----|------|----|------|----|------|----|
| 0          | 32   | 9  | 29   | 9  | 34   | 5  | 29   | 7  |
| 15         | 28   | 6  | 33   | 11 | 28   | 7  | 32   | 4  |
| 30         | 34   | 13 | 33   | 6  | 27   | 7  | 32   | 10 |
| 60         | 26   | 6  | 35   | 11 | 22   | 5  | 34   | 14 |
| 120        | 24   | 5  | 33   | 12 | 22   | 5  | 28   | 9  |
| 240        | 30   | 7  | 30   | 5  | 29   | 7  | 28   | 9  |

| Methionine | Mean | SD | Mean | SD | Mean | SD | Mean | SD |
|------------|------|----|------|----|------|----|------|----|
| 0          | 20   | 3  | 22   | 4  | 22   | 5  | 21   | 6  |
| 15         | 46   | 17 | 44   | 10 | 39   | 12 | 53   | 23 |
| 30         | 46   | 17 | 40   | 15 | 38   | 18 | 49   | 26 |
| 60         | 34   | 8  | 34   | 8  | 27   | 7  | 41   | 29 |
| 120        | 24   | 6  | 27   | 4  | 23   | 5  | 32   | 23 |
| 240        | 22   | 7  | 24   | 4  | 19   | 4  | 22   | 11 |

| Histidine | Mean | SD | Mean | SD | Mean | SD | Mean | SD |
|-----------|------|----|------|----|------|----|------|----|
| 0         | 74   | 15 | 67   | 17 | 16   | 17 | 67   | 18 |
| 15        | 74   | 20 | 75   | 14 | 19   | 20 | 83   | 18 |
| 30        | 85   | 34 | 70   | 26 | 28   | 29 | 85   | 23 |
| 60        | 77   | 22 | 67   | 24 | 14   | 15 | 77   | 30 |
| 120       | 62   | 19 | 55   | 9  | 12   | 13 | 67   | 16 |
| 240       | 79   | 22 | 63   | 14 | 11   | 12 | 66   | 27 |

**Table B: Ghrelin results for time 0, 15, 30, 60, 120 and 240 (Mean and SD)**

| time | DM 1 |     | DM 2 |     | 1&2     | DM 3 |     | DM 4 |     | 3&4     | all     |
|------|------|-----|------|-----|---------|------|-----|------|-----|---------|---------|
|      | Mean | SD  | Mean | SD  | p-value | Mean | SD  | Mean | SD  | p-value | p-value |
| 0    | 1402 | 665 | 1265 | 564 | 0,71    | 1435 | 582 | 1297 | 575 | 0,69    | 0,95    |
| 15   | 1327 | 633 | 1110 | 432 | 0,5     | 1297 | 619 | 971  | 396 | 0,29    | 0,6     |
| 30   | 1154 | 540 | 1044 | 446 | 0,71    | 1114 | 618 | 1038 | 383 | 0,8     | 0,97    |
| 60   | 1140 | 488 | 1059 | 464 | 0,77    | 1148 | 512 | 970  | 404 | 0,51    | 0,89    |
| 120  | 1135 | 496 | 1062 | 399 | 0,78    | 1079 | 522 | 961  | 393 | 0,66    | 0,92    |
| 240  | 1301 | 464 | 1392 | 558 | 0,76    | 1505 | 566 | 1299 | 456 | 0,5     | 0,89    |

**Table C: Results for glucose, insulin, GLP-1, PYY, BUN and CCK (Mean +/- SD). None of them demonstrated significant changes from baseline (pre-meal) to end of study period (240 min after meal and DM)**

| drink   | 1               |                 |         | 2               |                 |         | 3              |                 |         | 4               |                 |         |
|---------|-----------------|-----------------|---------|-----------------|-----------------|---------|----------------|-----------------|---------|-----------------|-----------------|---------|
|         | baseline        | end             | P-value | baseline        | end             | P-value | baseline       | end             | P-value | baseline        | end             | P-value |
| Glucose | 5,42 +/- 0,30   | 5,23 +/- 0,34   | 0,334   | 5,27 +/- 0,42   | 5,24 +/- 0,58   | 0,935   | 5,4 +/- 0,27   | 4,99 +/- 0,36   | 0,071   | 5,28 +/- 0,30   | 5,3 +/- 0,40    | 0,906   |
| insulin | 62,46 +/- 26,45 | 70,43 +/- 15,65 | 0,563   | 83,22 +/- 41,08 | 73,54 +/- 47,13 | 0,726   | 57 +/- 36,40   | 71,96 +/- 21,80 | 0,484   | 69,16 +/- 37,78 | 82,21 +/- 39,31 | 0,537   |
| GLP-1   | 20,43 +/- 4,31  | 20,86 +/- 4,64  | 0,871   | 19,57 +/- 3,58  | 21,57 +/- 4,66  | 0,420   | 18 +/- 3,00    | 21,2 +/- 2,71   | 0,131   | 22,5 +/- 3,43   | 19,38 +/- 2,39  | 0,068   |
| PYY     | 51,43 +/- 12,10 | 51,29 +/- 7,52  | 0,981   | 48,71 +/- 12,26 | 48,71 +/- 9,75  | 1,000   | 39,33 +/- 6,67 | 43,67 +/- 8,24  | 0,382   | 51,5 +/- 11,03  | 51,63 +/- 14,02 | 0,985   |
| BUN     | 3,18 +/- 0,41   | 3,61 +/- 0,81   | 0,260   | 3,25 +/- 0,83   | 3,37 +/- 0,78   | 0,800   | 3,41 +/- 0,99  | 3,37 +/- 0,36   | 0,937   | 3,28 +/- 0,74   | 3,27            | 0,991   |
| CCK     | 1,33 +/- 0,45   | 1,6 +/- 0,81    | 0,523   | 1,41 +/- 0,47   | 1,44 +/- 0,39   | 0,910   | 1,53 +/- 1,21  | 1,25 +/- 0,25   | 0,620   | 1,16 +/- 0,37   | 1,54 +/- 0,79   | 0,297   |
